Development 138, 3091 (2011) doi:10.1242/dev.070383  
© 2011. Published by The Company of Biologists Ltd

## The transcription factor FoxB mediates temporal loss of cellular competence for notochord induction in ascidian embryos

**Hidehiko Hashimoto, Takashi Enomoto, Gaku Kumano and Hiroki Nishida**

There was an error published in *Development* **138**, 2591-2600.

The name of the second author was incorrectly given as Atsushi Enomoto. The correct author list appears above.

The authors apologise to readers for this mistake.
